# Supplementary material for: Evolution history of duplicated smad3 genes in teleost: insights from Japanese flounder, Paralichthys olivaceus
Source: PubMed Central journal article supplement (PMC5045880; doi:10.7717/peerj.2500), 2016-09-27

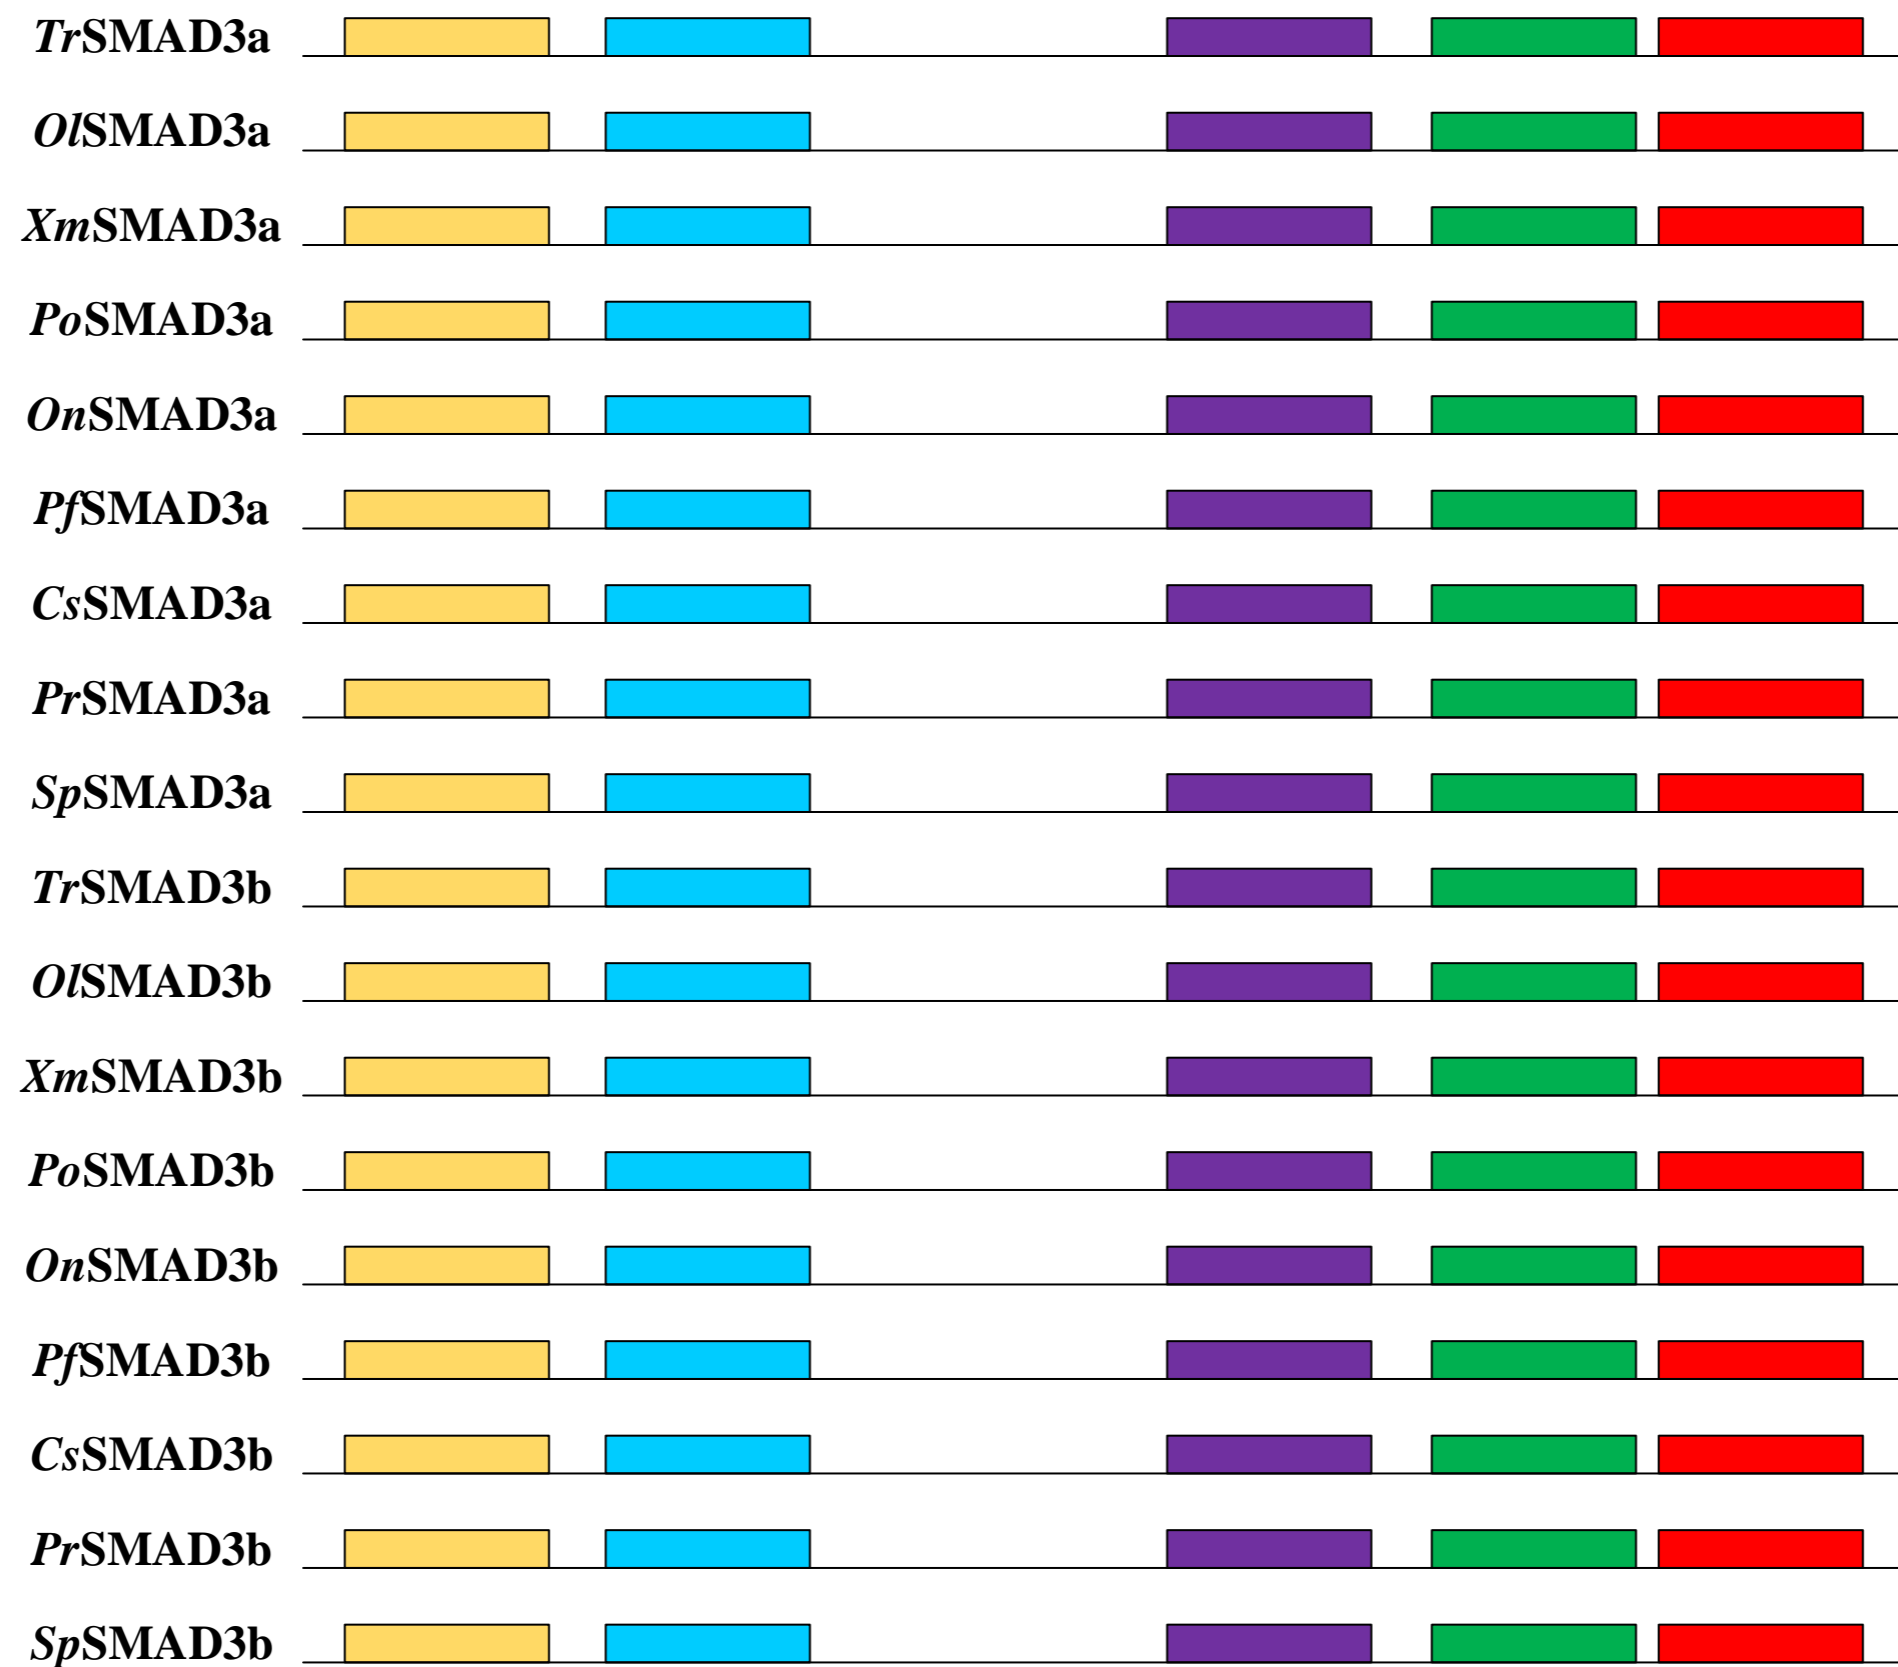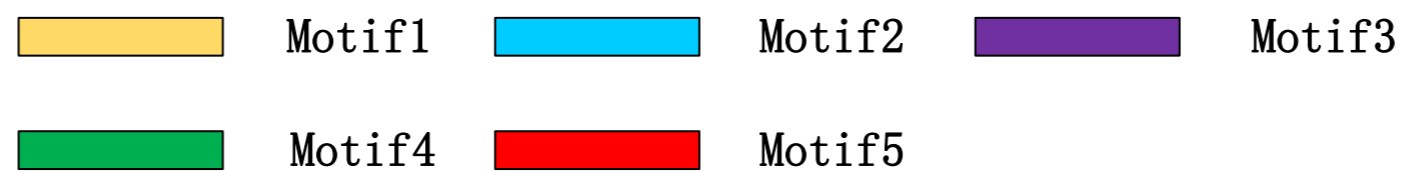

Supplement: peerj-04-2500-s004.pdf [file peerj-04-2500-s004.pdf]
