# Supplementary material for: Evolution history of duplicated smad3 genes in teleost: insights from Japanese flounder, Paralichthys olivaceus
Source: PeerJ. 2016 Sep 27;4:e2500. doi: 10.7717/peerj.2500 (PMC5045880; doi:10.7717/peerj.2500)
Supplement: Supplemental Information 8 [file peerj-04-2500-s008.xlsx]

## Sheet: Sheet1
tissue	smad3a_CP	smad3b_CP	18S rRNA_CP
Heart	26.46	26.77	17.58
Heart	26.88	26.72	17.71
Heart	26.88	26.65	17.68
Liver	28.08	28.45	16.86
Liver	28.55	28.7	16.98
Liver	28.73	28.26	17.01
Spleen	26.21	27.55	19.02
Spleen	26.81	27.8	18.99
Spleen	26.86	27.65	18.88
Kidney	27.19	27.61	18.31
Kidney	26.21	27.81	18.25
Kidney	26.78	27.62	18.29
Brain	29.03	26.69	19.46
Brain	29.67	26.25	19.5
Brain	29.46	26.32	19.45
Gill	28.24	27.85	19.94
Gill	27.59	27.99	19.88
Gill	27.95	27.71	19.92
Muscle	30.6	28.69	20.75
Muscle	30.29	29.13	20.84
Muscle	29.87	28.82	20.66
Intestine	26.84	27.62	18.55
Intestine	28.19	28.51	18.49
Intestine	27.98	28.14	18.31
Ovary	27.7	25.35	18.54
Ovary	27.27	25.56	18.61
Ovary	28.45	25.68	18.61
Testis	27.06	26.97	19.71
Testis	27.24	27.01	19.78
Testis	26.73	27.08	19.77
